# Supplementary material for: Nutrients Dissolution Kinetics of Aerosols at Qianliyan Island, the Yellow Sea by a High Time-resolution Nutrient Dissolution Experiment, Potential Linkages with Inorganic Compositions and P solubility controlled factors
Source: Copernicus journal article supplement (doi:10.5194/acp-2018-985), 2018-12-06
Supplement: Supplementary file 1 [file acp-2018-985-supplement.pdf]

## Supplementary Materials

### Figures:

**Fig. S1.** Daily -72h back-trajectories of air-masses in spring, summer, autumn, and winter during 2011-2012 at Qianliyan Island.

**Fig. S2.** Raw nutrient concentrations ( $\mu\text{mol}\cdot\text{L}^{-1}$ ) of leachates, that were collected at a 90s interval, in high time-resolution dissolution experiments. Noted that each of raw nutrient concentrations shown had subtracted the nutrient concentrations of the blank filter.

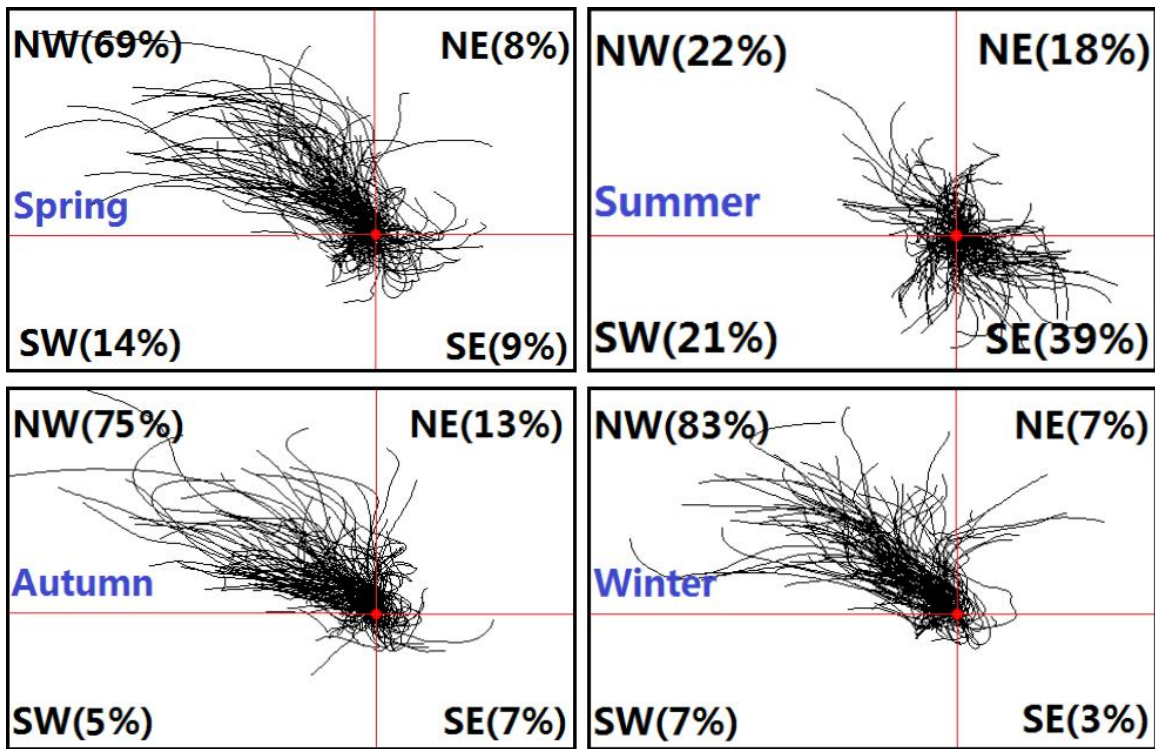

Fig. S1

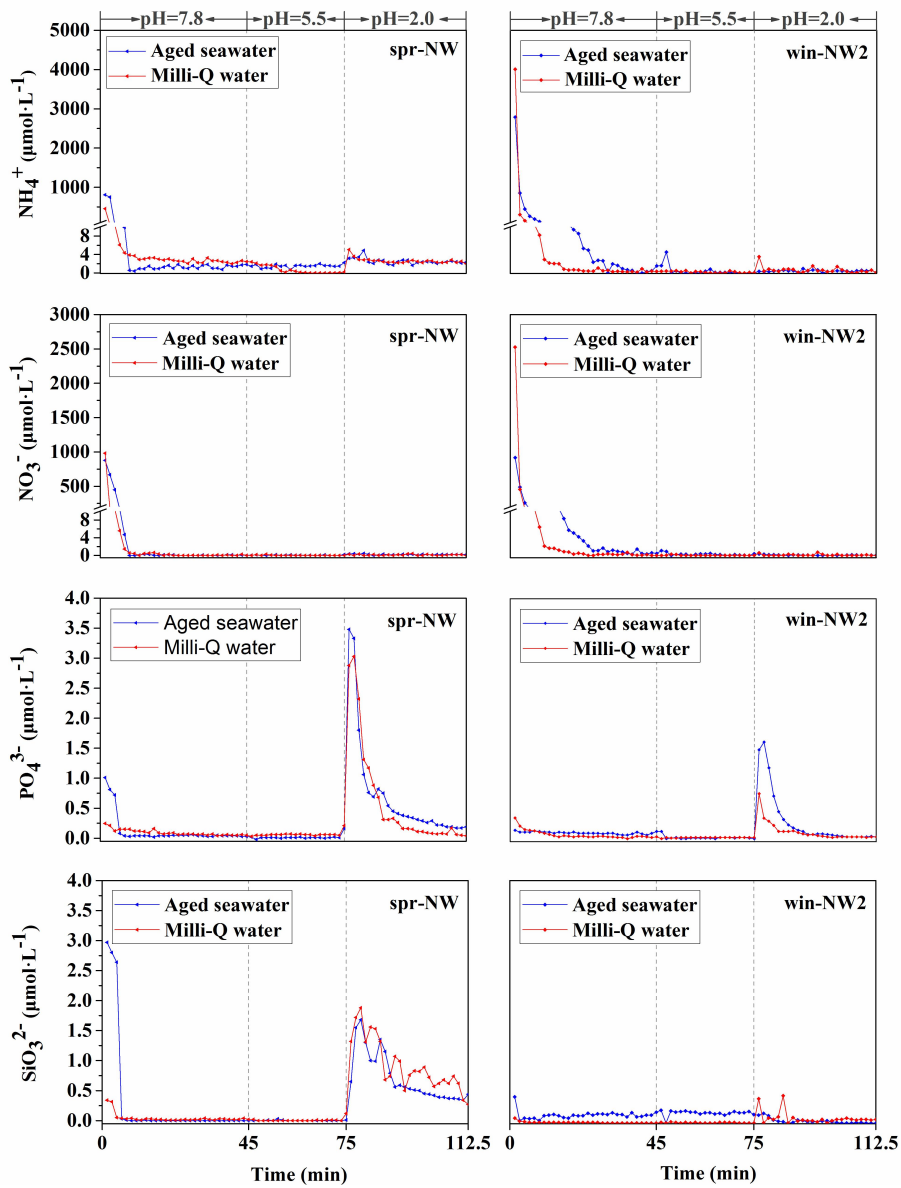

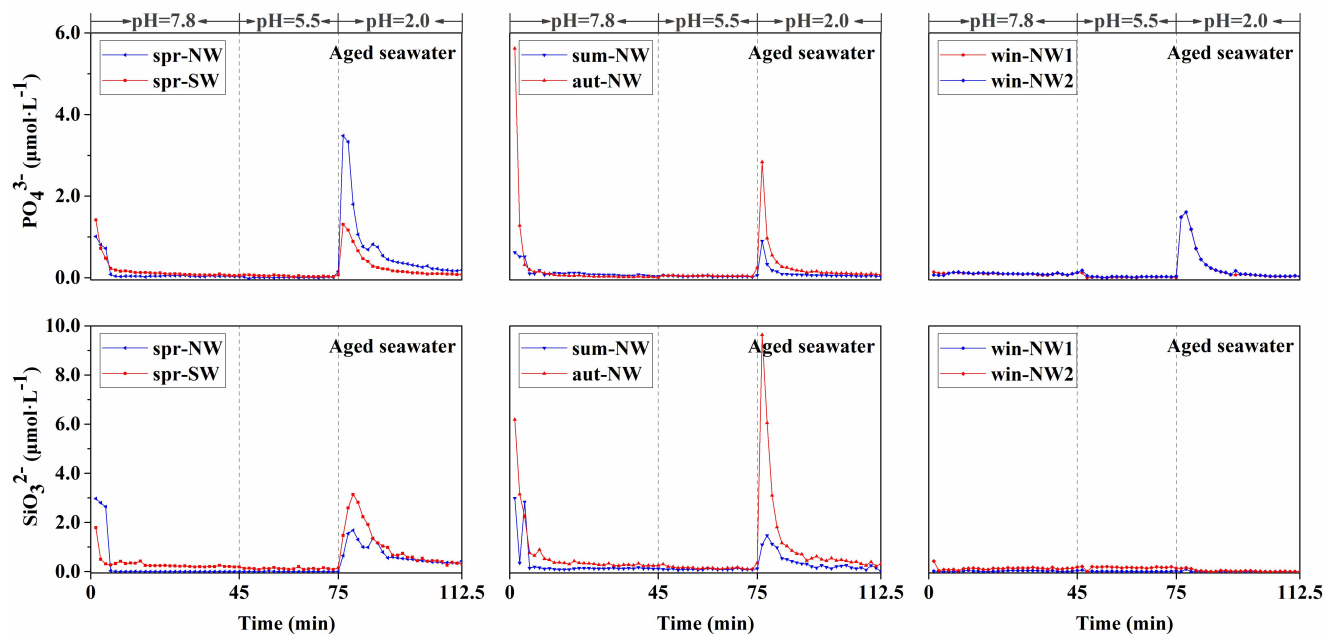

**Fig. S2**

**Table S1** Sampling date, source and TSP mass concentration ( $\mu\text{g}\cdot\text{m}^{-3}$ ) of six aerosols.

| <b>Sample number</b> | <b>Date</b> | <b>Season-Source</b> | <b>TSP</b> |
|----------------------|-------------|----------------------|------------|
| 1                    | 2011-04-28  | spr-SW               | 35.7       |
| 2                    | 2011-03-20  | spr-NW               | 236.4      |
| 3                    | 2012-06-12  | sum-NW               | 84.1       |
| 4                    | 2012-10-13  | atu-NW               | 80.4       |
| 5                    | 2011-02-12  | win-NW1              | 56.5       |
| 6                    | 2011-01-28  | win-NW2              | 129.3      |

**Table S2** Aerosol nutrient concentrations ( $\text{nmol}\cdot\text{m}^{-3}$ ) for ultrasound extractions.

| <b>Ultrasound extractions</b> | <b><math>\text{NH}_4^+</math></b> | <b><math>\text{NO}_3^-</math></b> | <b><math>\text{PO}_4^{3-}</math></b> | <b><math>\text{SiO}_3^{2-}</math></b> |
|-------------------------------|-----------------------------------|-----------------------------------|--------------------------------------|---------------------------------------|
| Milli-Q water-soluble         |                                   |                                   |                                      |                                       |
| spr-SW                        | 92.2                              | 67.8                              | 0.27                                 | 0.20                                  |
| spr-NW                        | 142.4                             | 233.2                             | 0.37                                 | 0.45                                  |
| sum-NW                        | 184.8                             | 77.4                              | 0.60                                 | 0.50                                  |
| atu-NW                        | 270.0                             | 280.0                             | 0.86                                 | 1.53                                  |
| win-NW1                       | 165.1                             | 108.6                             | 0.55                                 | 0.34                                  |
| win-NW2                       | 340.0                             | 284.5                             | 0.63                                 | 0.30                                  |
| Milli-Q acid-soluble          |                                   |                                   |                                      |                                       |
| spr-SW                        | 95.2                              | 72.7                              | 0.66                                 |                                       |
| spr-NW                        | 182.3                             | 233.9                             | 2.66                                 |                                       |
| sum-NW                        | 194.4                             | 72.2                              | 0.86                                 |                                       |
| atu-NW                        | 194.7                             | 200.0                             | 1.72                                 |                                       |
| win-NW1                       | 206.4                             | 97.4                              | 0.81                                 |                                       |
| win-NW2                       | 471.0                             | 264.7                             | 1.85                                 |                                       |

**Table S3** Aerosol nutrient concentrations ( $\text{nmol}\cdot\text{m}^{-3}$ ) for high time-resolution dissolution experiments.

| <b>High Time-resolution Dissolution Experiment</b> | <b><math>\text{NH}_4^+</math></b>    | <b><math>\text{NO}_3^-</math></b>     | <b><math>\text{PO}_4^{3-}</math></b> | <b><math>\text{SiO}_3^{2-}</math></b> |
|----------------------------------------------------|--------------------------------------|---------------------------------------|--------------------------------------|---------------------------------------|
| Milli-Q water-soluble                              |                                      |                                       |                                      |                                       |
| spr-NW                                             | 56.3                                 | 109.9                                 | 0.37                                 | 0.13                                  |
| win-NW2                                            | 322.1                                | 222.1                                 | 0.16                                 | 0.02                                  |
| Milli-Q acid-soluble                               |                                      |                                       |                                      |                                       |
| spr-NW                                             | 62.3                                 | 110.1                                 | 1.72                                 | 2.23                                  |
| win-NW2                                            | 323.2                                | 222.3                                 | 0.36                                 | 0.17                                  |
| Aged seawater-soluble                              |                                      |                                       |                                      |                                       |
| spr-NW                                             | 157.4                                | 189.4                                 | 0.36                                 | 0.77                                  |
| win-NW2                                            | 348.3                                | 152.0                                 | 0.23                                 | 0.51                                  |
| Aged seawater acid-soluble                         |                                      |                                       |                                      |                                       |
| spr-NW                                             | 163.1                                | 189.9                                 | 1.96                                 | 2.37                                  |
| win-NW2                                            | 349.1                                | 152.2                                 | 0.73                                 | 0.56                                  |
| <b>High Time-resolution Dissolution Experiment</b> | <b><math>\text{PO}_4^{3-}</math></b> | <b><math>\text{SiO}_3^{2-}</math></b> |                                      |                                       |
| Aged seawater-soluble                              |                                      |                                       |                                      |                                       |
| spr-SW                                             | 0.62                                 | 1.17                                  |                                      |                                       |
| spr-NW                                             | 0.36                                 | 0.77                                  |                                      |                                       |
| sum-NW                                             | 0.20                                 | 0.49                                  |                                      |                                       |
| atu-NW                                             | 0.82                                 | 2.07                                  |                                      |                                       |
| win-NW1                                            | 0.50                                 | 0.12                                  |                                      |                                       |
| win-NW2                                            | 0.23                                 | 0.51                                  |                                      |                                       |
| Aged seawater acid-soluble                         |                                      |                                       |                                      |                                       |
| spr-SW                                             | 1.36                                 | 3.70                                  |                                      |                                       |
| spr-NW                                             | 1.96                                 | 2.37                                  |                                      |                                       |
| sum-NW                                             | 0.32                                 | 0.91                                  |                                      |                                       |
| atu-NW                                             | 1.46                                 | 4.73                                  |                                      |                                       |
| win-NW1                                            | 1.49                                 | 0.13                                  |                                      |                                       |
| win-NW2                                            | 0.73                                 | 0.56                                  |                                      |                                       |

**Table S4** Aerosol (a)  $\text{PO}_4^{3-}$  and (b)  $\text{SiO}_3^{2-}$  dissolution rates ( $10^{-12} \text{ mol} \cdot \text{m}^{-2} \cdot \text{s}^{-1}$ ) at pH 7.8, 5.5 and 2.0 for high time-resolution dissolution experiments.

|                      | $r_{a1}$ | $r_{a2}$ | $r_{a3}$ |
|----------------------|----------|----------|----------|
| <b>Milli-Q water</b> |          |          |          |
| spr-NW               | 49       | 32       | 339      |
| win-NW2              | 24       | 23       | 47       |
| <b>Aged seawater</b> |          |          |          |
| spr-SW               | 2553     | 1814     | 3916     |
| spr-NW               | 1798     | 181      | 370      |
| sum-NW               | 506      | 325      | 431      |
| atu-NW               | 2333     | 1428     | 2253     |
| win-NW1              | 160      | 116      | 0        |
| win-NW2              | 194      | 218      | 170      |

(a)

|                      | $r_{a1}$ | $r_{a2}$ | $r_{a3}$ |
|----------------------|----------|----------|----------|
| <b>Milli-Q water</b> |          |          |          |
| spr-NW               | 109      | 60       | 280      |
| win-NW2              | 108      | 70       | 107      |
| <b>Aged seawater</b> |          |          |          |
| spr-SW               | 1562     | 968      | 1454     |
| spr-NW               | 148      | 85       | 314      |
| sum-NW               | 206      | 132      | 152      |
| atu-NW               | 992      | 568      | 694      |
| win-NW1              | 654      | 488      | 1017     |
| win-NW2              | 145      | 97       | 219      |

(b)
